# Supplementary material for: Protective coinfection: influenza reprograms myeloid cells to limit CD8 T cell–mediated malaria pathology
Source: Research Square preprint supplement (doi:10.21203/rs.3.rs-9404453/v1), 2026-05-08
Supplement: Supplementary file 1 [file 0133c0d55ac599d1c8741a20.xlsx]

## Sheet: Supp Fig 1
	Supp. Fig. 1A	Group	Treatment Info	DPI:	8	19	8	8	8	8	7	10	7	7	19	19	19	19	19	19	19	19
		PbA+X31	5x10^5 pRBCs PbA (IP, 200 μL) @ 0 DPI 3x10^4 PFU X31 (IN, 40 μL) @ 0 DPI	Survival (0=alive, 1=dead)	1	0	1	1	1
		PbA	5x10^5 pRBCs PbA (IP, 200 μL) @ 0 DPI PBS (IN, 40 μL) @ 0 DPI							1	1	1	1	1
		X31	Krebs (IP, 200 μL) @ 0 DPI 3x10^4 PFU X31 (IN, 40 μL) @ 0 DPI												0	0	0	0	0
		Mock	Krebs (IP, 200 μL) @ 0 DPI PBS (IN, 40 μL) @ 0 DPI																	0	0	0
	Supp. Fig. 1B (left)	Group	Treatment Info	Absolute Cell Number CD8 T Cells (Lungs, 6 DPI)
		PbE+X31	5x10^5 pRBCs PbE (IP, 200 μL) @ 0 DPI 3x10^4 PFU X31 (IN, 40 μL) @ 0 DPI	10900000	16700000	14500000	11100000	12300000	12300000	1600000	6990000	11300000	8770000	15000000	14200000	14300000	8810000	14800000
		PbE	5x10^5 pRBCs PbE (IP, 200 μL) @ 0 DPI PBS (IN, 40 μL) @ 0 DPI	15600000	20200000	23700000	11700000	2330000	16500000	14400000	14900000	6520000	9720000	10800000	5150000	9010000
		X31	Krebs (IP, 200 μL) @ 0 DPI 3x10^4 PFU X31 (IN, 40 μL) @ 0 DPI	6550000	5880000	6820000	5930000	6650000	4240000	3310000	7790000	6690000	10000000	2860000	1830000	3240000	4440000	3220000
		Mock	Krebs (IP, 200 μL) @ 0 DPI PBS (IN, 40 μL) @ 0 DPI	5450000	4790000	2940000	3400000	1810000	3220000	2680000	3170000	1330000	203000	770000
	Supp. Fig. 1B (right)	Group	Treatment Info	Absolute Cell Number CD44hi CD62Llo CD8 T Cells (Lungs, 6 DPI)
		PbE+X31	5x10^5 pRBCs PbE (IP, 200 μL) @ 0 DPI 3x10^4 PFU X31 (IN, 40 μL) @ 0 DPI	9060000	14500000	12000000	8590000	10100000	11100000	731000	5990000	9900000	7150000	14100000	13400000	13400000	8070000	13500000
		PbE	5x10^5 pRBCs PbE (IP, 200 μL) @ 0 DPI PBS (IN, 40 μL) @ 0 DPI	10600000	16800000	20200000	9650000	859000	13800000	12400000	12900000	5900000	8810000	10100000	4730000	8440000
		X31	Krebs (IP, 200 μL) @ 0 DPI 3x10^4 PFU X31 (IN, 40 μL) @ 0 DPI	3270000	3220000	3720000	3160000	4200000	1750000	1260000	4670000	3330000	5560000	1290000	809000	2310000	3110000	1950000
		Mock	Krebs (IP, 200 μL) @ 0 DPI PBS (IN, 40 μL) @ 0 DPI	257000	223000	223000	410000	171000	372000	324000	369000	236000	80600	178000
	Supp. Fig. 1C (left)	Group	Treatment Info	% NP366+ Cells (% of CD44hi CD62Llo CD8 T Cells) (Lungs, 6 DPI)
		PbE+X31	5x10^5 pRBCs PbE (IP, 200 μL) @ 0 DPI 3x10^4 PFU X31 (IN, 40 μL) @ 0 DPI	0.072	0.11	0.23	0.039	0.13	0.39	0.087	0.12	0.23	0.084	0.15	0	0.24	0.34	0.75
		PbE	5x10^5 pRBCs PbE (IP, 200 μL) @ 0 DPI PBS (IN, 40 μL) @ 0 DPI	0.14	0.082	0.27	0.2	0.11	0.047	0.086	0.14	0	0.091	0.054	0.2
		X31	Krebs (IP, 200 μL) @ 0 DPI 3x10^4 PFU X31 (IN, 40 μL) @ 0 DPI	0.76	1.39	0.83	1.03	0.88	0.98	1.53	1.56	1.48	3.83	2.15	1.74	2.29	1.39	2.11
		Mock	Krebs (IP, 200 μL) @ 0 DPI PBS (IN, 40 μL) @ 0 DPI	1.41	0	0.45	0	0.24	0.43	0.89	0.72	0.19	1.27
	Supp. Fig. 1C (middle)	Group	Treatment Info	# NP366+ Cells (Lungs, 6 DPI)
		PbE+X31	5x10^5 pRBCs PbE (IP, 200 μL) @ 0 DPI 3x10^4 PFU X31 (IN, 40 μL) @ 0 DPI	7380	10100	24000	4440	14600	28800	10900	11900	19100	7370	11300	12200	14300	23900	6090
		PbE	5x10^5 pRBCs PbE (IP, 200 μL) @ 0 DPI PBS (IN, 40 μL) @ 0 DPI	11900	7810	17800	9950	6830	5190	16300	11500	0	15200	6600	19000
		X31	Krebs (IP, 200 μL) @ 0 DPI 3x10^4 PFU X31 (IN, 40 μL) @ 0 DPI	6190	7920	26100	26000	22000	33700	50500	55600	43300	155000	23800	21700	124000	46300	63200
		Mock	Krebs (IP, 200 μL) @ 0 DPI PBS (IN, 40 μL) @ 0 DPI	2580	0	2960	0	1540	2090	4190	3130	731	3380
	Supp. Fig. 1C (right)	Group	Treatment Info	NP366 Median Fluorescence Intensity (gated on NP366+ activated CD8 T cells) (Lungs, 6 DPI)
		PbE+X31	5x10^5 pRBCs PbE (IP, 200 μL) @ 0 DPI 3x10^4 PFU X31 (IN, 40 μL) @ 0 DPI	4904	4769	3982	3923	4168	13497	14774	6789	12543	10855	6908	19208	19482	19873	5667
		PbE	5x10^5 pRBCs PbE (IP, 200 μL) @ 0 DPI PBS (IN, 40 μL) @ 0 DPI	5251	11535	5367	8779	15589	12818	20503	10377	20387	16506	8990	15614	13908	17357	23120
	Fig. 2C (left)			Absolute Cell Number NP366+ CD8s (Lungs)
		Group	Treatment Info	3 DPI	6 DPI	9 DPI
		X31	3x10^4 PFU X31 (IN, 40 μL) @ 0 DPI	0	1.02	5.58
				0	2.17	7.11
				0.065	1.15	9.14
				0	0.76	9.69
				0	0.98
		PR8	35 PFU PR8 (IN, 40 μL) @ 0 DPI	0.064	0.16	24.4
				0.16	0.32	4.96
				0	0.99	10.6
				0	1.22	8.62
				0.062	0.3	8.7
		Mock	PBS (IN, 40 μL) @ 0 DPI	0	0.088	0.14
				0.13	0.099	0.035
				0	0.2	0.21
					0.18

## Sheet: Supp Fig 3
	Supp. Fig. 3A (left)			% Arg1+ (Freq of AMs) (Lungs)
		Group	Treatment Info	3 DPI	6 DPI	9 DPI
		X31	3x10^4 PFU X31 (IN, 40 μL) @ 0 DPI	2.31	29.4	10.2
				3.06	8.47	9.53
				0	12.1	8.95
				0.99	18.6	4.55
				1.34	6.91
		PR8	35 PFU PR8 (IN, 40 μL) @ 0 DPI	0	5.46	12.5
				0.6	0	16.3
				0	5.24	11.8
				0	3.41	23.3
				0.24	3.25	24.3
		Mock	PBS (IN, 40 μL) @ 0 DPI	0	2.03	1.17
				0	0	0
				0.33	1.39	1.42
					0
	Supp. Fig. 3A (middle)			% PDL1+ (Freq of AMs) (Lungs)
		Group	Treatment Info	3 DPI	6 DPI	9 DPI
		X31	3x10^4 PFU X31 (IN, 40 μL) @ 0 DPI	20.6	35.5	12
				17.6	33.7	9.61
				5.1	35.7	15.8
				18.3	53.2	4.55
				19.1	56.7
		PR8	35 PFU PR8 (IN, 40 μL) @ 0 DPI	2.61	27.1	22.4
				4.83	31.7	26.3
				3.42	17.4	29
				7.57	24.3	31.9
				17.2	33.8	25.3
		Mock	PBS (IN, 40 μL) @ 0 DPI	4.24	3.05	0.7
				5.42	1.85	0.6
				4.23	7.29	1.06
					2.94
	Supp. Fig. 3A (right)			% iNOS+ (Freq of AMs) (Lungs)
		Group	Treatment Info	3 DPI	6 DPI	9 DPI
		X31	3x10^4 PFU X31 (IN, 40 μL) @ 0 DPI	14.5	8.91	16.3
				9.34	6.92	19
				0.36	5.34	12.5
				4.94	11.9	3.41
				5.31	9.7
		PR8	35 PFU PR8 (IN, 40 μL) @ 0 DPI	0.92	2.15	17.4
				1.51	5.12	30.6
				1.05	2.87	32.6
				1.32	2.01	24.5
				4.29	3.49	49.8
		Mock	PBS (IN, 40 μL) @ 0 DPI	2.42	0	0.7
				0.71	0	0.24
				3.91	0.69	0.35
					0
	Supp. Fig. 3B (left)			Absolute Cell # Arg1+ (Lungs)
		Group	Treatment Info	3 DPI	6 DPI	9 DPI
		X31	3x10^4 PFU X31 (IN, 40 μL) @ 0 DPI	47000	727000
				77300	366000	203000
				0	775000	93600
				29200	1130000	157000
				200000	673000	17800
		PR8	35 PFU PR8 (IN, 40 μL) @ 0 DPI	0	235000	112000
				1490	312000	491000
				0	343000	303000
				0	197000	467000
				1710	286000	625000
		Mock	PBS (IN, 40 μL) @ 0 DPI	0	8630	6570
				0	0	0
				1010	5220	7880
					0
	Supp. Fig. 3B (middle)			Absolute Cell # PDL1+ (Lungs)
		Group	Treatment Info	3 DPI	6 DPI	9 DPI
		X31	3x10^4 PFU X31 (IN, 40 μL) @ 0 DPI	292000	221000	323000
				242000	301000	187000
				16100	341000	219000
				143000	724000	13100
				780000	950000
		PR8	35 PFU PR8 (IN, 40 μL) @ 0 DPI	3150	91800	156000
				3830	245000	925000
				3450	189000	838000
				3220	115000	492000
				31000	303000	1290000
		Mock	PBS (IN, 40 μL) @ 0 DPI	6810	0	3970
				1690	0	2390
				12100	2510	2010
					0
	Supp. Fig. 3B (right)			Absolute Cell # iNOS+ (Lungs)
		Group	Treatment Info	3 DPI	6 DPI	9 DPI
		X31	3x10^4 PFU X31 (IN, 40 μL) @ 0 DPI	417000	880000	241000
				458000	1460000	93600
				226000	2280000	274000
				539000	3240000	17800
				2840000	5560000
		PR8	35 PFU PR8 (IN, 40 μL) @ 0 DPI	8710	1150000	201000
				11800	1510000	789000
				11200	1120000	745000
				18400	1420000	640000
				125000	2960000	650000
		Mock	PBS (IN, 40 μL) @ 0 DPI	11800	12700	3970
				13000	11300	5890
				13300	26500	6130
					5900
	Supp. Fig. 3C	Group	Treatment Info	ID	DPI:	0	2	4	6
		Heat- killed X31	3x10^4 PFU X31 (IN, 40 μL) heated at 56°C for 30 min @ 0 DPI	M1	% Weight Loss	100	99	100	102
				M2		100	100	102	104
				M3		100	105	106	109
				M4		100	99	102	104
				M5		100	101	101	103
		X31	3x10^4 PFU X31 (IN, 40 μL) @ 0 DPI	M1		100	88	85	81
				M2		100	95	94	91
				M3		100	90	83	76
				M4		100	98	95	90
				M5		100	89	81	75
		Mock	PBS (IN, 40 μL) @ 0 DPI	M1		100	102	104	107
				M2		100	103	103	104
				M3		100	100	100	100
	Supp Fig. 3D			Absolute Cell Number (Lungs)
		Infection	Treatment Info	Subset	3 DPI							6 DPI
		Heat- killed X31	3x10^4 PFU X31 (IN, 40 μL) heated at 56°C for 30 min @ 0 DPI		M1	M2	M3	M4	M5	Avg	Proportion	M1	M2	M3	M4		Avg	Proportion
				AM	206035	216650	65400	376280	443895	261652	0.0465417	198550	238080	365000	213150	80370	219030	0.0387028
				IM	168995	194985	73030	274030	285675	199343	0.0354584	114950	153760	189800	83300	29070	114176	0.020175
				Mono	678295	934690	303020	1067490	1.04162e+06	805022	0.143194	1.01574e+06	974640	1376050	984900	509580	972182	0.171786
				Neut	432905	860410	150420	744380	1182255	674074	0.119902	614460	600160	894250	722750	752400	716804	0.12666
				NK	2009420	3.68305e+06	1144500	3860960	3806070	2900800	0.515984	1.37313e+06	1674000	3.1244e+06	1298500	1.58517e+06	1811040	0.320013
				CD11b-	555600	838745	291030	764830	1454745	780990	0.13892	1517340	1.64176e+06	2901750	1732150	1337220	1826044	0.322664
		X31	3x10^4 PFU X31 (IN, 40 μL) @ 0 DPI		M1	M2	M3	M4	M5	Avg	Proportion	M1	M2	M3	M4	M5	Avg	Proportion
				AM	1650750	2000775	2935970	1953315	1.71456e+06	2051074	0.204335	1.60371e+06	2382590	1.99998e+06	2097490	1365600	1889874	0.151717
				IM	701375	490280	665250	716560	533920	621477	0.0619138	168675	161760	116530	195325	147940	158046	0.0126877
				Mono	906750	782285	1578860	1315990	1.0152e+06	1119817	0.11156	3373500	4920200	4173400	3726200	3300200	3898700	0.312983
				Neut	2.46838e+06	1153600	2807355	2473510	3098240	2400216	0.239118	2447085	5594200	3604300	2764600	2640160	3410069	0.273756
				NK	3007000	2822715	2767440	2.58031e+06	3948000	3025092	0.301371	700650	647040	1544700	2229710	1655790	1355578	0.108824
				CD11b-	651000	1.0094e+06	722905	957710	759520	820107	0.081702	1.75422e+06	1.8198e+06	1.71543e+06	1730880	1.70131e+06	1744328	0.140032
		Mock	PBS (IN, 40 μL) @ 0 DPI		M1	M2	M3			Avg	Proportion	M1	M2	M3			Avg	Proportion
				AM	168795	481060	234630			294828	0.0461789	346375	291445	291060			309627	0.0354899
				IM	95480	646200	223965			321882	0.0504163	118175	79485	124740			107467	0.012318
				Mono	398970	1252910	970515			874132	0.136915	1.73188e+06	1449655	1440180			1540570	0.176582
				Neut	630850	872370	1.00962e+06			837613	0.131195	1348825	1320965	1251180			1306990	0.149809
				NK	1629980	4451600	3.6972e+06			3.25959e+06	0.51055	2587625	2657070	2302020			2.51557e+06	0.288339
				CD11b-	322245	1.2565e+06	810540			796428	0.124744	2644675	2.77819e+06	3409560			2.94414e+06	0.337462
	Supp. Fig. 3E (left)			Absolute Cell # Arg1+ (Lungs)
		Group	Treatment Info	3 DPI	6 DPI
		X31Heat- killed X31	3x10^4 PFU X31 (IN, 40 μL) heated at 56°C for 30 min @ 0 DPI	144000	0
				80500	0
				33800	0
				188000	376000
				123000	655000
		X31	3x10^4 PFU X31 (IN, 40 μL) @ 0 DPI	1910000	5120000
				2470000	3470000
				2970000	4920000
				2070000	4410000
				1980000	4740000
		Mock	PBS (IN, 40 μL) @ 0 DPI	23900	0
				64600	0
				334000	0
	Supp. Fig. 3E (middle)			Absolute Cell # PDL1+ (Lungs)
		Group	Treatment Info	3 DPI	6 DPI
		X31Heat- killed X31	3x10^4 PFU X31 (IN, 40 μL) heated at 56°C for 30 min @ 0 DPI	6460000	8310000
				10700000	11900000
				4670000	2020000
				13400000	16500000
				13800000	18400000
		X31	3x10^4 PFU X31 (IN, 40 μL) @ 0 DPI	35500000	35100000
				38000000	32700000
				35300000	41600000
				30300000	32300000
				36300000	34500000
		Mock	PBS (IN, 40 μL) @ 0 DPI	4960000	4830000
				11600000	23900000
				12100000	9070000
	Supp. Fig. 3E (right)			Absolute Cell # iNOS+ (Lungs)
		Group	Treatment Info	3 DPI	6 DPI
		X31Heat- killed X31	3x10^4 PFU X31 (IN, 40 μL) heated at 56°C for 30 min @ 0 DPI	250000	0
				409000	0
				203000	0
				376000	0
				1130000	655000
		X31	3x10^4 PFU X31 (IN, 40 μL) @ 0 DPI	1710000	3110000
				1340000	1930000
				1390000	4790000
				1310000	3050000
				1090000	3120000
		Mock	PBS (IN, 40 μL) @ 0 DPI	269000	0
				768000	0
				444000	363000
	Supp Fig. 3F			Absolute Cell Number (Lungs)
		Infection	Treatment Info	Subset	6 DPI							9 DPI
		PR8 LAIV	6x10^3 PFU PR8 LAIV (IN, 40 μL) @ 0 DPI		M1	M2	M3	M4	M5	Avg	Proportion	M1	M2	M3	M4		Avg	Proportion
				AM	179850	853440	593010	292110	531505	489983	0.0871564	551576	658303	409448	503695	555625	535729	0.0946639
				IM	128700	609600	637935	205440	261035	368542	0.0655549	479997	228391	245668	138420	463750	311245	0.0549974
				Mono	1.0362e+06	2641600	3294500	1605000	1.6983e+06	2055120	0.365557	3.02735e+06	2471994	3.1788e+06	1957105	3298750	2786800	0.49243
				Neut	694650	1.67894e+06	1.89284e+06	828180	1.40896e+06	1300714	0.231366	1608411	1.37482e+06	1.57079e+06	1.02661e+06	1211875	1.3585e+06	0.240049
				NK	1224300	1823720	1.62928e+06	645210	2531725	1570847	0.279417	2105250	4.10656e+06	2665131	2303155	4.9e+06	3.21602e+06	0.568274
				CD11b-	259050	330200	389350	417300	547230	388626	0.0691274	909468	1.12404e+06	986396	895885	1089375	1001033	0.176884
		X31	3x10^4 PFU X31 (IN, 40 μL) @ 0 DPI		M1	M2	M3	M4	M5	Avg	Proportion	M1	M2	M3	M4	M5	Avg	Proportion
				AM	5415200	7303000	7571750	10877000	6390900	7511570	0.74833	187000	720000	318330	188700	175450	317896	0.0255203
				IM	2.604e+06	2654150	1485040	2749050	1668600	2232168	0.222377	79750	330000	137550	234600	145200	185420	0.0148853
				Mono	4.144e+06	4997650	4230410	4544500	3831300	4349572	0.43332	1309000	4335000	2554500	3.3762e+06	1669800	2648900	0.21265
				Neut	3.8696e+06	5155700	5373500	5982350	5256900	5127610	0.510831	574750	2137500	1123980	2254200	716925	1361471	0.109297
				NK	4.7936e+06	1411550	2896805	5855700	7.2819e+06	4447911	0.443117	976250	4282500	1.15149e+06	4202400	2374625	2597453	0.20852
				CD11b-	935200	904700	693670	1281400	1336500	1030294	0.102642	1.72425e+06	2.775e+06	2837460	1596300	1231175	2032837	0.163194
		Mock	PBS (IN, 40 μL) @ 0 DPI		M1	M2	M3			Avg	Proportion	M1	M2	M3			Avg	Proportion
				AM	542790	541500	294152			459480	0.0719684	285420	225225	139450			216698	0.0248383
				IM	410760	404700	196101			337187	0.0528136	234300	392700	194497			273832	0.0313871
				Mono	2831310	3266100	1.74675e+06			2.61472e+06	0.409543	2530440	3592050	2.30093e+06			2.80781e+06	0.321835
				Neut	2000010	1402200	1045872			1482694	0.232234	1.60176e+06	2402400	2.32662e+06			2.11026e+06	0.241881
				NK	4.13205e+06	4195200	2.40768e+06			3.57831e+06	0.560471	4473000	5220600	3.19268e+06			4.29543e+06	0.492348
				CD11b-	816630	746700	682722			748684	0.117266	826440	1253175	884410			988008	0.113247
	Supp. Fig. 3G (left)			Absolute Cell # Arg1+ (Lungs)
		Group	Treatment Info	6 DPI	9 DPI
		PR8 LAIV	6x10^3 PFU PR8 LAIV (IN, 40 μL) @ 0 DPI	3800	9620
				102000	6910
				98000	1420
				4490	13800
				31500	13100
		X31	3x10^4 PFU X31 (IN, 40 μL) @ 0 DPI	1010000	12700
				1200000	28500
				1690000	17300
				2380000	1430
				1060000	13300
		Mock	PBS (IN, 40 μL) @ 0 DPI	3110	937
				0	6160
				9440	0
	Supp. Fig. 3G (middle)			Absolute Cell # PDL1+ (Lungs)
		Group	Treatment Info	6 DPI	9 DPI
		PR8 LAIV	6x10^3 PFU PR8 LAIV (IN, 40 μL) @ 0 DPI	47900	59300
				541000	69900
				333000	36200
				112000	56900
				255000	35000
		X31	3x10^4 PFU X31 (IN, 40 μL) @ 0 DPI	4700000	20900
				6700000	90000
				7330000	36900
				10100000	4080
				5370000	32700
		Mock	PBS (IN, 40 μL) @ 0 DPI	132000	17900
				125000	5170
				83500	2800
	Supp. Fig. 3G (right)			Absolute Cell # iNOS+ (Lungs)
		Group	Treatment Info	6 DPI	9 DPI
		PR8 LAIV	6x10^3 PFU PR8 LAIV (IN, 40 μL) @ 0 DPI	1060	0
				102000	2050
				56400	610
				2210	563
				29200	0
		X31	3x10^4 PFU X31 (IN, 40 μL) @ 0 DPI	566000	0
				1310000	302
				1030000	297
				1480000	0
				640000	0
		Mock	PBS (IN, 40 μL) @ 0 DPI	0	0
				0	323
				3630	0

## Sheet: Supp Fig 4
	Supp. Fig. 4A (top)					% Viable Cells (of CD8s)
		Responder Cell Source	Suppressor Cell Source	Treatment	Culture Group	Unstim	Stim	100 μM	10 μM	1 μM	0.1 μM
		B6 Naïve Spleen	N/A	DMSO	CD8 Only	29.55	44
						33.8	61.1
						52.75	75.95
		B6 Naïve Spleen	B6, 3x10^4 PFU X31 (IN, 40 μL), Lungs @ 6 DPI	DMSO	1:1 + DMSO			55.3
								45.6
								32.25
								57.8
		B6 Naïve Spleen	B6, 3x10^4 PFU X31 (IN, 40 μL), Lungs @ 6 DPI	norNOHA	1:1 + norNOHA			3.83	52.1	50.6	54.9
								42.2	9.41	25.3	26.7
										59.5	58.6
	Supp. Fig. 4A (bottom)					Suppression Ratio
		Responder Cell Source	Suppressor Cell Source	Treatment	Culture Group	Unstim	Stim	100 μM	10 μM	1 μM	0.1 μM
		B6 Naïve Spleen	N/A	DMSO	CD8 Only	0.0681319	1
						0.301105	1
						0.129015	1
		B6 Naïve Spleen	B6, 3x10^4 PFU X31 (IN, 40 μL), Lungs @ 6 DPI	DMSO	1:1 + DMSO			0.162637
								0.246154
								0.209945
								0.0508772
		B6 Naïve Spleen	B6, 3x10^4 PFU X31 (IN, 40 μL), Lungs @ 6 DPI	norNOHA	1:1 + norNOHA			0.259669	0.143485	0.230455	0.207221
								0.0294197	0.239411	0.176059	0.21547
										0.102159	0.117544
	Supp. Fig. 4B (top)					% Viable Cells (of CD8s)
		Responder Cell Source	Suppressor Cell Source	Treatment	Culture Group	Unstim	Stim	1000 μM	100 μM	10 μM	1 μM	0.1 μM	0.01 μM
		B6 Naïve Spleen	N/A	dH2O	CD8 Only	34.1	59
						33.5	63.2
		B6 Naïve Spleen	B6, 3x10^4 PFU X31 (IN, 40 μL), Lungs @ 6 DPI	L-NAME	1:1 + L-NAME			44.6	33.5	36.3	31.3	31	29.3
		B6 Naïve Spleen	B6, 3x10^4 PFU X31 (IN, 40 μL), Lungs @ 6 DPI	dH2O	1:1 + dH2O			37.5
	Supp. Fig. 4B (bottom)					Suppression Ratio
		Responder Cell Source	Suppressor Cell Source	Treatment	Culture Group	Unstim	Stim	1000 μM	100 μM	10 μM	1 μM	0.1 μM	0.01 μM
		B6 Naïve Spleen	N/A	dH2O	CD8 Only	0.297683	1
						0.304762	1
		B6 Naïve Spleen	B6, 3x10^4 PFU X31 (IN, 40 μL), Lungs @ 6 DPI	L-NAME	1:1 + L-NAME			0.180036	0.26738	0.210339	0.233512	0.208556	0.262032
		B6 Naïve Spleen	B6, 3x10^4 PFU X31 (IN, 40 μL), Lungs @ 6 DPI	dH2O	1:1 + dH2O			0.290553
	Supp. Fig. 4C (top)					% Viable Cells (of CD8s)
		Responder Cell Source	Suppressor Cell Source	Treatment	Culture Group	Unstim	Stim	10 μg	5 μg	2.5 μg	1.625 μg	0.625 μg	0.313 μg	0.16 μg
		B6 Naïve Spleen	N/A	dH2O	CD8 Only	29.55	44
						33.8	61.1
		B6 Naïve Spleen	B6, 3x10^4 PFU X31 (IN, 40 μL), Lungs @ 6 DPI	⍺PDL1/⍺PDL2	1:1 + ⍺PDL1/L2			51	49.3	50.5	51.9	54	52.8	6.06
								38.5	35	32.5	30.7	31.6	27.7	14.9
		B6 Naïve Spleen	B6, 3x10^4 PFU X31 (IN, 40 μL), Lungs @ 6 DPI	IgG2b/IgG2a	1:1 + IgG2b/a			53.5
								53.5
	Supp. Fig. 4C (bottom)					Suppression Ratio
		Responder Cell Source	Suppressor Cell Source	Treatment	Culture Group	Unstim	Stim	10 μg	5 μg	2.5 μg	1.625 μg	0.625 μg	0.313 μg	0.16 μg
		B6 Naïve Spleen	N/A	dH2O	CD8 Only	0.0681319	1
						0.301105	1
		B6 Naïve Spleen	B6, 3x10^4 PFU X31 (IN, 40 μL), Lungs @ 6 DPI	⍺PDL1/⍺PDL2	1:1 + ⍺PDL1/L2			0.130612	0.152276	0.159498	0	0.186813	0.18336	0.190267
								0.294659	0.279926	0.287293	0.233886	0.25046	0.292818	0.274401
		B6 Naïve Spleen	B6, 3x10^4 PFU X31 (IN, 40 μL), Lungs @ 6 DPI	IgG2b/IgG2a	1:1 + IgG2b/a			0.256201
								0.195212

## Sheet: Supp Fig 5
	Supp. Fig. 5A (top left)	Group	Treatment Info	Freq of Arg1+ AM (% of AMs, Lungs, 6 DPI)
		PbE+X31	5x10^5 pRBCs PbE (IP, 200 μL) @ 0 DPI 3x10^4 PFU X31 (IN, 40 μL) @ 0 DPI	2.19	2.1	1.89	1.84	2.56	1.29	1.63	0.81	0.69	3.36
		PbE	5x10^5 pRBCs PbE (IP, 200 μL) @ 0 DPI PBS (IN, 40 μL) @ 0 DPI	1.84	0.88	1.31	1.9	1.57	1.96	2.04	2.65	2.9	2.8
		X31	Krebs (IP, 200 μL) @ 0 DPI 3x10^4 PFU X31 (IN, 40 μL) @ 0 DPI	17.2	13.3	15.3	18.8	20	10.7	10.2	8.76	12.6	3.68
		Mock	Krebs (IP, 200 μL) @ 0 DPI PBS (IN, 40 μL) @ 0 DPI	1.02	1.33	2.11	3.61	3.57	16.2
	Supp. Fig. 5A (top mid)	Group	Treatment Info	Freq of PDL1+ AM (% of AMs, Lungs, 6 DPI)
		PbE+X31	5x10^5 pRBCs PbE (IP, 200 μL) @ 0 DPI 3x10^4 PFU X31 (IN, 40 μL) @ 0 DPI	88.6	87.1	84.6	89.4	87.5	88.5	90.8	90.4	95.5	90.6
		PbE	5x10^5 pRBCs PbE (IP, 200 μL) @ 0 DPI PBS (IN, 40 μL) @ 0 DPI	86	86.4	88.8	87.4	86.8	86.9	77.3	82.7	93.5	82.2
		X31	Krebs (IP, 200 μL) @ 0 DPI 3x10^4 PFU X31 (IN, 40 μL) @ 0 DPI	86.3	89.8	84.1	87.1	87.3	80.6	89.8	71.6	91.4	75.7
		Mock	Krebs (IP, 200 μL) @ 0 DPI PBS (IN, 40 μL) @ 0 DPI	51.7	54.5	53.6	16.8	64.6	24.1
	Supp. Fig. 5A (top right)	Group	Treatment Info	Freq of iNOS+ AM (% of AMs, Lungs, 6 DPI)
		PbE+X31	5x10^5 pRBCs PbE (IP, 200 μL) @ 0 DPI 3x10^4 PFU X31 (IN, 40 μL) @ 0 DPI	0.65	0.35	0.073	0.25	0.21
		PbE	5x10^5 pRBCs PbE (IP, 200 μL) @ 0 DPI PBS (IN, 40 μL) @ 0 DPI	1.78	0.24	0	3.8	0.4
		X31	Krebs (IP, 200 μL) @ 0 DPI 3x10^4 PFU X31 (IN, 40 μL) @ 0 DPI	4.48	4.7	6.84	6.09	1.51
		Mock	Krebs (IP, 200 μL) @ 0 DPI PBS (IN, 40 μL) @ 0 DPI	0	0.5	0
	Supp. Fig. 5A (bottom left)	Group	Treatment Info	Freq of Arg1+ AM (% of AMs, BALF, 6 DPI)
		PbE+X31	5x10^5 pRBCs PbE (IP, 200 μL) @ 0 DPI 3x10^4 PFU X31 (IN, 40 μL) @ 0 DPI	44.7	51	49.9	49.7	31.5	33.6	32.8	35.1	33.1
		PbE	5x10^5 pRBCs PbE (IP, 200 μL) @ 0 DPI PBS (IN, 40 μL) @ 0 DPI	0	4.26	5.53	6.38	6.17	33.2	13.4	12.1	14.4	6.35
		X31	Krebs (IP, 200 μL) @ 0 DPI 3x10^4 PFU X31 (IN, 40 μL) @ 0 DPI	48.3	38	41.5	45.7	46.3	31.3	36.1	39.2	36.8	26.8
		Mock	Krebs (IP, 200 μL) @ 0 DPI PBS (IN, 40 μL) @ 0 DPI	0	30	12.5	41.8	11.1	33.3
	Supp. Fig. 5A (bottom mid)	Group	Treatment Info	Freq of PDL1+ AM (% of AMs, BALF, 6 DPI)
		PbE+X31	5x10^5 pRBCs PbE (IP, 200 μL) @ 0 DPI 3x10^4 PFU X31 (IN, 40 μL) @ 0 DPI	92.2	93	96.1	94.9	65.5	73.4	64.8	75	72.1
		PbE	5x10^5 pRBCs PbE (IP, 200 μL) @ 0 DPI PBS (IN, 40 μL) @ 0 DPI	66.7	89.4	85.9	87.6	81.2	41.6	55.2	58.6	71.2	44.4
		X31	Krebs (IP, 200 μL) @ 0 DPI 3x10^4 PFU X31 (IN, 40 μL) @ 0 DPI	85.9	95.3	98.2	97.4	96.7	82.8	89.2	76.8	86.6	90.2
		Mock	Krebs (IP, 200 μL) @ 0 DPI PBS (IN, 40 μL) @ 0 DPI	0	10	25	21.8	66.7	51.9
	Supp. Fig. 5A (bottom right)	Group	Treatment Info	Freq of iNOS+ AM (% of AMs, BALF, 6 DPI)
		PbE+X31	5x10^5 pRBCs PbE (IP, 200 μL) @ 0 DPI 3x10^4 PFU X31 (IN, 40 μL) @ 0 DPI	16.8	4.43	10.3	4.49
		PbE	5x10^5 pRBCs PbE (IP, 200 μL) @ 0 DPI PBS (IN, 40 μL) @ 0 DPI	0.53	2.99	0	0	1.59
		X31	Krebs (IP, 200 μL) @ 0 DPI 3x10^4 PFU X31 (IN, 40 μL) @ 0 DPI	28.8	29.3	6.18	24.7	28.4
		Mock	Krebs (IP, 200 μL) @ 0 DPI PBS (IN, 40 μL) @ 0 DPI	0	0	0
	Supp. Fig. 4B (top left)	Group	Treatment Info	TCRβ Absolute Cell Number (Lungs, 6 DPI)
		X31 GEM	Krebs (IP, 200 μL) @ 0 DPI 3x10^4 PFU X31 (IN, 40 μL) @ 0 DPI 1.2 mg GEM (IP, 200 μL) @ 4 DPI	6750000	6200000	4790000	5870000	5700000
		X31 PBS	Krebs (IP, 200 μL) @ 0 DPI 3x10^4 PFU X31 (IN, 40 μL) @ 0 DPI PBS (IP, 200 μL) @ 4 DPI	3390000	2850000	4720000	5440000	6860000
		Mock GEM	Krebs (IP, 200 μL) @ 0 DPI PBS (IN, 40 μL) @ 0 DPI 1.2 mg GEM (IP, 200 μL) @ 4 DPI	4780000	5360000	3400000	3780000	4980000
		Mock PBS	Krebs (IP, 200 μL) @ 0 DPI PBS (IN, 40 μL) @ 0 DPI PBS (IP, 200 μL) @ 4 DPI	6390000	5110000	5880000	4490000	5460000
	Supp. Fig. 4B (top mid)	Group	Treatment Info	CD8⍺ Absolute Cell Number (Lungs, 6 DPI)
		X31 GEM	Krebs (IP, 200 μL) @ 0 DPI 3x10^4 PFU X31 (IN, 40 μL) @ 0 DPI 1.2 mg GEM (IP, 200 μL) @ 4 DPI	3700000	5650000	3860000	4980000	4920000
		X31 PBS	Krebs (IP, 200 μL) @ 0 DPI 3x10^4 PFU X31 (IN, 40 μL) @ 0 DPI PBS (IP, 200 μL) @ 4 DPI	3720000	3120000	4710000	5660000	8320000
		Mock GEM	Krebs (IP, 200 μL) @ 0 DPI PBS (IN, 40 μL) @ 0 DPI 1.2 mg GEM (IP, 200 μL) @ 4 DPI	1880000	5360000	4030000	4390000	4210000
		Mock PBS	Krebs (IP, 200 μL) @ 0 DPI PBS (IN, 40 μL) @ 0 DPI PBS (IP, 200 μL) @ 4 DPI	4940000	4690000	4660000	3880000	5460000
	Supp. Fig. 4B (top right)	Group	Treatment Info	CD4 Absolute Cell Number (Lungs, 6 DPI)
		X31 GEM	Krebs (IP, 200 μL) @ 0 DPI 3x10^4 PFU X31 (IN, 40 μL) @ 0 DPI 1.2 mg GEM (IP, 200 μL) @ 4 DPI	3510000	3100000	2620000	3210000	2870000
		X31 PBS	Krebs (IP, 200 μL) @ 0 DPI 3x10^4 PFU X31 (IN, 40 μL) @ 0 DPI PBS (IP, 200 μL) @ 4 DPI	2390000	1960000	3020000	3780000	4540000
		Mock GEM	Krebs (IP, 200 μL) @ 0 DPI PBS (IN, 40 μL) @ 0 DPI 1.2 mg GEM (IP, 200 μL) @ 4 DPI	1980000	2660000	1580000	1960000	2600000
		Mock PBS	Krebs (IP, 200 μL) @ 0 DPI PBS (IN, 40 μL) @ 0 DPI PBS (IP, 200 μL) @ 4 DPI	4500000	3620000	4290000	3320000	3690000
	Supp. Fig. 4B (bottom left)	Group	Treatment Info	CD11b- Absolute Cell Number (Lungs, 6 DPI)
		X31 GEM	Krebs (IP, 200 μL) @ 0 DPI 3x10^4 PFU X31 (IN, 40 μL) @ 0 DPI 1.2 mg GEM (IP, 200 μL) @ 4 DPI	749000	377000	361000	392000	342000
		X31 PBS	Krebs (IP, 200 μL) @ 0 DPI 3x10^4 PFU X31 (IN, 40 μL) @ 0 DPI PBS (IP, 200 μL) @ 4 DPI	443000	290000	580000	669000	912000
		Mock GEM	Krebs (IP, 200 μL) @ 0 DPI PBS (IN, 40 μL) @ 0 DPI 1.2 mg GEM (IP, 200 μL) @ 4 DPI	316000	291000	200000	255000	421000
		Mock PBS	Krebs (IP, 200 μL) @ 0 DPI PBS (IN, 40 μL) @ 0 DPI PBS (IP, 200 μL) @ 4 DPI	379000	408000	394000	305000	432000
	Supp. Fig. 4B (bottom mid)	Group	Treatment Info	NK Absolute Cell Number (Lungs, 6 DPI)
		X31 GEM	Krebs (IP, 200 μL) @ 0 DPI 3x10^4 PFU X31 (IN, 40 μL) @ 0 DPI 1.2 mg GEM (IP, 200 μL) @ 4 DPI	4700000	3490000	3320000	3810000	3860000
		X31 PBS	Krebs (IP, 200 μL) @ 0 DPI 3x10^4 PFU X31 (IN, 40 μL) @ 0 DPI PBS (IP, 200 μL) @ 4 DPI	2930000	2330000	5510000	5710000	7260000
		Mock GEM	Krebs (IP, 200 μL) @ 0 DPI PBS (IN, 40 μL) @ 0 DPI 1.2 mg GEM (IP, 200 μL) @ 4 DPI	3060000	2800000	2060000	1990000	2520000
		Mock PBS	Krebs (IP, 200 μL) @ 0 DPI PBS (IN, 40 μL) @ 0 DPI PBS (IP, 200 μL) @ 4 DPI	3600000	3750000	2740000	2730000	4330000
	Supp. Fig. 4B (bottom right)	Group	Treatment Info	B Cell Absolute Cell Number (Lungs, 6 DPI)
		X31 GEM	Krebs (IP, 200 μL) @ 0 DPI 3x10^4 PFU X31 (IN, 40 μL) @ 0 DPI 1.2 mg GEM (IP, 200 μL) @ 4 DPI	4300000	5850000	4550000	4130000	6150000
		X31 PBS	Krebs (IP, 200 μL) @ 0 DPI 3x10^4 PFU X31 (IN, 40 μL) @ 0 DPI PBS (IP, 200 μL) @ 4 DPI	3810000	2930000	3670000	5330000	5390000
		Mock GEM	Krebs (IP, 200 μL) @ 0 DPI PBS (IN, 40 μL) @ 0 DPI 1.2 mg GEM (IP, 200 μL) @ 4 DPI	2900000	3640000	3630000	3130000	4880000
		Mock PBS	Krebs (IP, 200 μL) @ 0 DPI PBS (IN, 40 μL) @ 0 DPI PBS (IP, 200 μL) @ 4 DPI	5870000	4950000	5010000	4070000	4910000

## Sheet: Supp Fig 6
	Supp. Fig. 7B	p_val	avg_log2FC	pct.1	pct.2	p_val_adj	cluster	gene
		0	1.13021	0.908	0.517	0	0	Gzma
		0	1.13479	0.964	0.574	0	0	Anxa2
		0	1.16509	0.985	0.657	0	0	S100a6
		0	1.11849	0.99	0.666	0	0	Gzmb
		0	1.16999	0.997	0.755	0	0	Lgals1
		3.22787e-297	1.11528	0.855	0.478	1.08766e-292	0	Serpinb6b
		5.99922e-227	1.14452	0.707	0.378	2.0215e-222	0	Il12rb2
		1.38616e-192	1.43219	0.503	0.209	4.67082e-188	0	Havcr2
		1.74922e-179	1.13546	0.594	0.296	5.89419e-175	0	Ifng
		4.41868e-152	1.15867	0.68	0.404	1.48892e-147	0	Ccl4
		4.15138e-147	1.27785	0.469	0.218	1.39885e-142	0	Itgax
		1.71686e-145	1.11371	0.534	0.279	5.78513e-141	0	Ctla2b
		2.51887e-141	1.05069	0.537	0.265	8.48758e-137	0	Mt1
		8.32861e-129	1.34214	0.413	0.191	2.80641e-124	0	Rom1
		8.26289e-107	1.2272	0.358	0.163	2.78426e-102	0	Rbm47
		1.13533e-95	1.00261	0.441	0.243	3.82562e-91	0	Snx9
		1.26793e-90	1.24251	0.332	0.152	4.27243e-86	0	Ccl3
		3.39724e-90	1.2028	0.301	0.13	1.14473e-85	0	Klrg1
		1.10894e-83	1.3965	0.272	0.118	3.73669e-79	0	Epas1
		7.8539e-83	1.19371	0.313	0.148	2.64645e-78	0	AA467197
		0	4.32654	0.889	0.114	0	1	Ccr7
		0	3.90582	0.859	0.14	0	1	Sell
		0	3.57164	0.882	0.186	0	1	Tcf7
		0	4.46033	0.594	0.05	0	1	Nsg2
		0	2.50236	0.858	0.332	0	1	Il7r
		0	2.61866	0.833	0.318	0	1	Bach2
		0	3.19139	0.643	0.141	0	1	Rgs10
		0	2.86272	0.616	0.138	0	1	Aff3
		0	3.14789	0.632	0.197	0	1	Jun
		0	2.87869	0.629	0.198	0	1	Actn1
		0	5.25543	0.413	0.025	0	1	Dapl1
		0	1.99015	0.784	0.408	0	1	Bcl2
		0	2.07492	0.739	0.371	0	1	Socs1
		0	3.9967	0.395	0.043	0	1	Il6ra
		0	1.97899	0.811	0.468	0	1	Inpp4b
		0	6.09292	0.354	0.015	0	1	Igfbp4
		0	4.59438	0.362	0.024	0	1	Tnfsf8
		0	3.51528	0.395	0.065	0	1	Treml2
		0	1.81792	0.844	0.514	0	1	Zfp36l1
		0	4.31335	0.322	0.036	0	1	Rflnb
		0	3.8667	0.936	0.143	0	2	Top2a
		0	4.42083	0.85	0.067	0	2	Kif11
		0	4.63667	0.933	0.171	0	2	H1f5
		0	3.33525	0.9	0.141	0	2	Ccna2
		0	4.1061	0.831	0.076	0	2	Cdk1
		0	3.95268	0.802	0.07	0	2	Aurkb
		0	4.81587	0.805	0.077	0	2	H2ac8
		0	2.82964	0.91	0.183	0	2	Cdca8
		0	3.11358	0.968	0.244	0	2	Mki67
		0	3.2778	0.864	0.157	0	2	Rrm2
		0	2.95487	0.953	0.255	0	2	Pclaf
		0	2.96844	0.881	0.185	0	2	Smc2
		0	3.47832	0.787	0.093	0	2	Knl1
		0	2.8941	0.897	0.204	0	2	Incenp
		0	2.54599	0.957	0.267	0	2	Birc5
		0	4.15553	0.734	0.054	0	2	Prc1
		0	3.4314	0.932	0.258	0	2	H2ax
		0	3.1821	0.775	0.105	0	2	Tpx2
		0	4.23548	0.78	0.116	0	2	H1f3
		0	2.67038	0.821	0.164	0	2	Spc24
		0	2.27639	0.98	0.814	0	3	Ccl5
		2.60274e-77	1.64644	0.482	0.314	8.7702e-73	3	Ifit3
		1.03516e-67	1.18783	0.666	0.693	3.48808e-63	3	Pde7a
		2.10173e-63	1.24677	0.657	0.657	7.08201e-59	3	Irf7
		9.50852e-62	1.98517	0.416	0.282	3.20399e-57	3	Lilrb4b
		6.43311e-60	2.00149	0.388	0.247	2.1677e-55	3	Tox
		3.86705e-58	1.92387	0.372	0.237	1.30304e-53	3	Ifit1bl1
		1.53126e-52	1.16335	0.601	0.585	5.15973e-48	3	Rtp4
		6.99857e-50	2.11798	0.315	0.186	2.35824e-45	3	Serpina3g
		1.21802e-49	1.04144	0.65	0.707	4.10424e-45	3	H2-Q6
		1.96394e-40	1.37652	0.503	0.47	6.6177e-36	3	Fasl
		1.73923e-38	1.22891	0.523	0.499	5.86052e-34	3	Ypel3
		6.02456e-37	1.55204	0.389	0.29	2.03004e-32	3	Scgb1a1
		3.06718e-32	1.77293	0.358	0.287	1.03352e-27	3	Gm30054
		3.88941e-32	1.22664	0.542	0.563	1.31058e-27	3	AU020206
		3.79019e-31	1.80114	0.389	0.32	1.27714e-26	3	Pdcd1
		1.89215e-28	1.86673	0.3	0.216	6.37579e-24	3	Lilrb4a
		2.28072e-28	1.60462	0.426	0.394	7.68511e-24	3	Cxcr6
		3.0852e-26	2.8192	0.137	0.065	1.03959e-21	3	Cx3cr1
		3.18118e-26	1.655	0.364	0.316	1.07193e-21	3	Thap3
